# Supplementary material
Source: Royal Society of Chemistry journal article supplement (doi:10.1039/d6dt01075j)
Supplement: d6dt01075j1.pdf [file d6dt01075j1.pdf]

### Supplementary Information

**Figure S1:** Lattice parameter and unit cell volume of CSO and Bi doped CSO compounds

**Figure S2:** Linear Williamson-Hall plots shown for the CSO and Bi-doped CSO compounds

**Figure S3:** Schematic representation of variation in band gap values of CSO and Bi doped CSO compounds

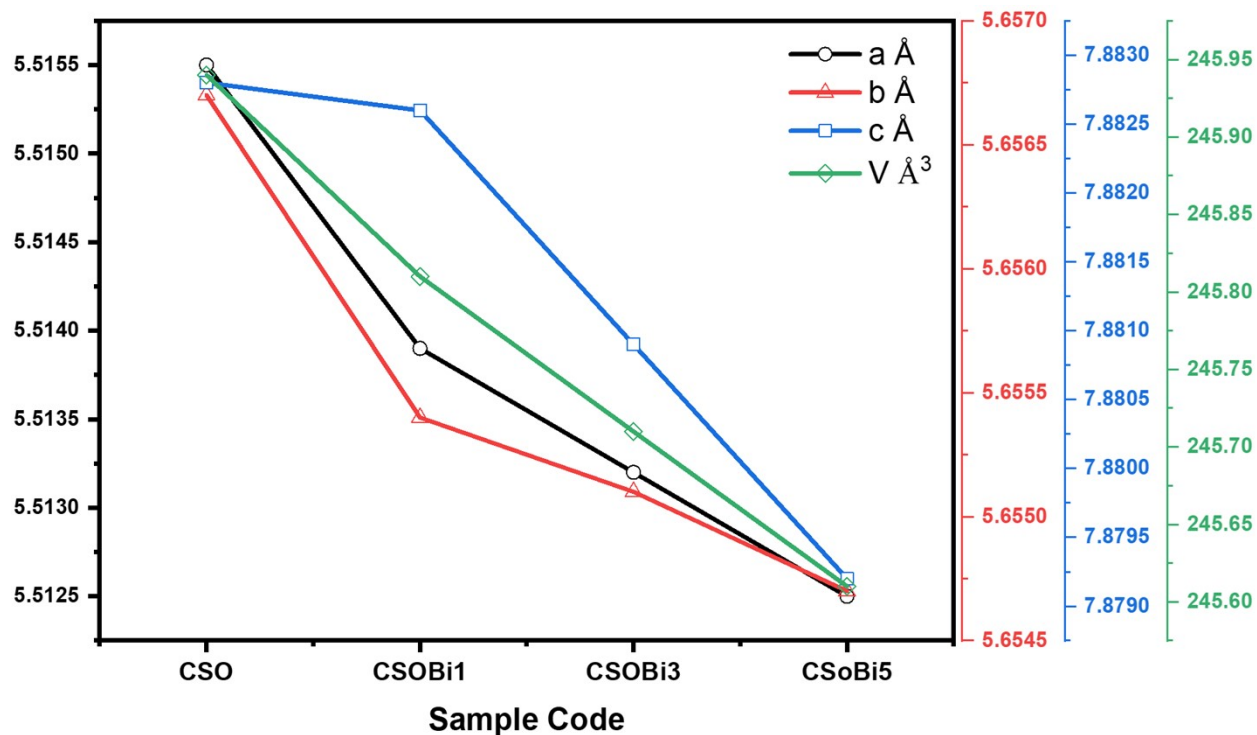

**Figure S1:** Lattice parameter and unit cell volume of CSO and Bi doped CSO compounds

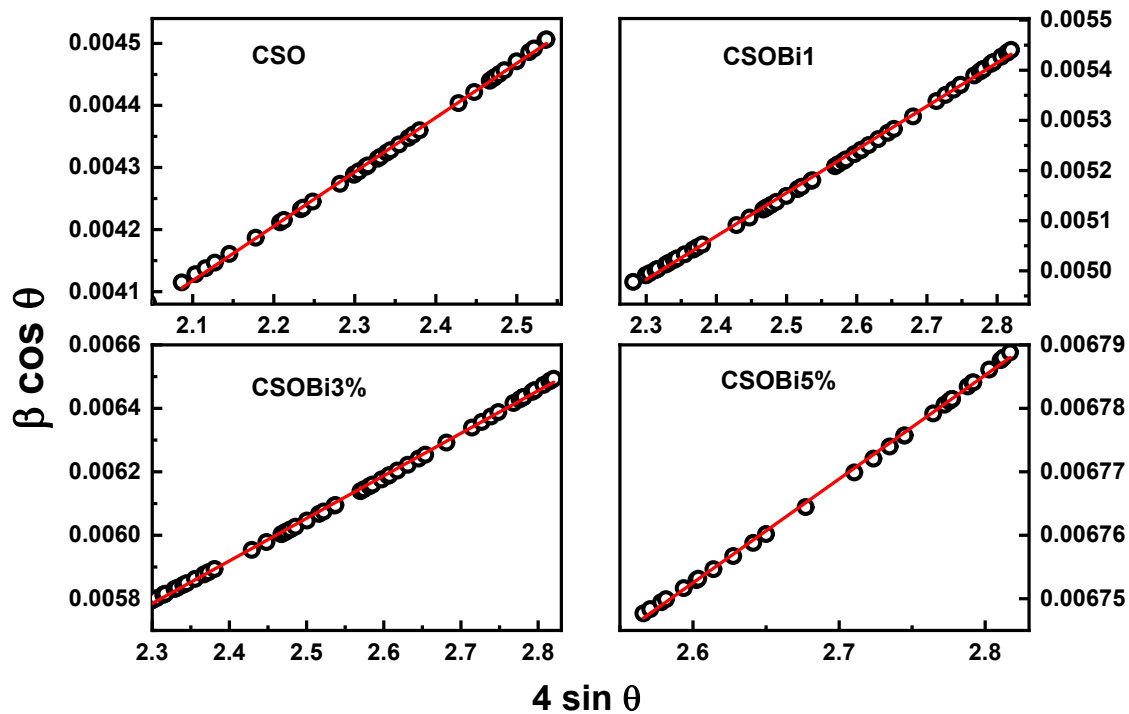

Figur

e S2: Linear Williamson-Hall plots shown for the CSO and Bi-doped CSO compounds.

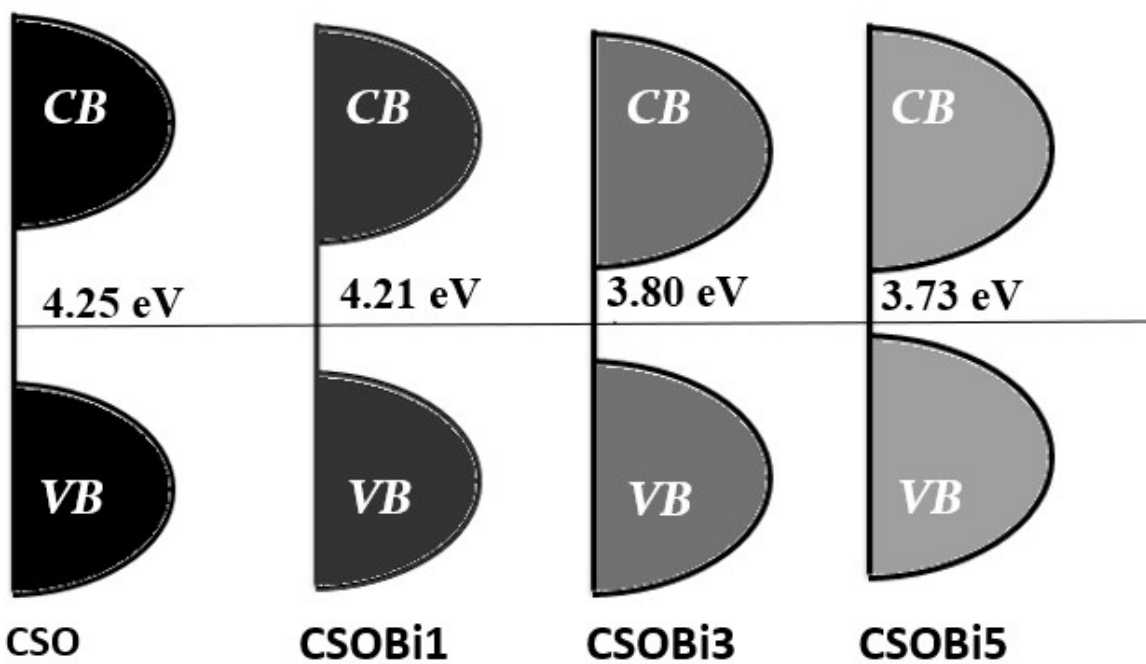

Figure S3: Schematic representation of variation in band gap values of CSO and Bi doped CSO Compounds
